# Supplementary material for: Child drowning and associated risk factors: Findings from a qualitative study in Bangladesh
Source: PubMed Central journal article supplement — Health Sci Rep. 2023 Jun 29;6(7):e1380. doi: 10.1002/hsr2.1380 (PMC10308348; doi:10.1002/hsr2.1380), 2023-06-29
Supplement: HSR2-6-e1380-s001.pdf [file HSR2-6-e1380-s001.pdf]

# Supporting information

## Child drowning and associated risk factors: Findings from a qualitative study in Bangladesh

### Standards for Reporting Qualitative Research (SRQR) Checklist: a- 21 items\*

Developed from:

O'Brien, B. C., Harris, I. B., Beckman, T. J., Reed, D. A., & Cook, D. A. (2014). Standards for reporting qualitative research: A synthesis of recommendations. *Academic Medicine*, 89, 1245–1251. Retrieved from <https://doi.org/10.1097/ACM.0000000000000388>

#### Title and abstract

#### Page/line no(s).

|                                                                                                                                                                                                                                                       |   |
|-------------------------------------------------------------------------------------------------------------------------------------------------------------------------------------------------------------------------------------------------------|---|
| <b>Title</b> - Concise description of the nature and topic of the study Identifying the study as qualitative or indicating the approach (e.g., ethnography, grounded theory) or data collection methods (e.g., interview, focus group) is recommended | 1 |
| <b>Abstract</b> - Summary of key elements of the study using the abstract format of the intended publication; typically includes background, purpose, methods, results, and conclusions                                                               | 2 |

#### Introduction

|                                                                                                                                                              |   |
|--------------------------------------------------------------------------------------------------------------------------------------------------------------|---|
| <b>Problem formulation</b> - Description and significance of the problem/phenomenon studied; review of relevant theory and empirical work; problem statement | 3 |
| <b>Purpose or research question</b> - Purpose of the study and specific objectives or questions                                                              | 4 |

#### Methods

|                                                                                                                                                                                                                                                                                                                          |   |
|--------------------------------------------------------------------------------------------------------------------------------------------------------------------------------------------------------------------------------------------------------------------------------------------------------------------------|---|
| <b>Qualitative approach and research paradigm</b> - Qualitative approach (e.g., ethnography, grounded theory, case study, phenomenology, narrative research) and guiding theory if appropriate; identifying the research paradigm (e.g., postpositivist, constructivist/interpretivist) is also recommended; rationale** | 4 |
|--------------------------------------------------------------------------------------------------------------------------------------------------------------------------------------------------------------------------------------------------------------------------------------------------------------------------|---|

|                                                                                                                                                                                                                                                                                                                                                                                                      |     |
|------------------------------------------------------------------------------------------------------------------------------------------------------------------------------------------------------------------------------------------------------------------------------------------------------------------------------------------------------------------------------------------------------|-----|
| <b>Researcher characteristics and reflexivity</b> - Researchers' characteristics that may influence the research, including personal attributes, qualifications/experience, relationship with participants, assumptions, and/or presuppositions; potential or actual interaction between researchers' characteristics and the research questions, approach, methods, results, and/or transferability | 5   |
| <b>Context</b> - Setting/site and salient contextual factors; rationale**                                                                                                                                                                                                                                                                                                                            | 6   |
| <b>Sampling strategy</b> - How and why research participants, documents, or events were selected; criteria for deciding when no further sampling was necessary (e.g., sampling saturation); rationale**                                                                                                                                                                                              | 6   |
| <b>Ethical issues pertaining to human subjects</b> - Documentation of approval by an appropriate ethics review board and participant consent, or explanation for lack thereof; other confidentiality and data security issues                                                                                                                                                                        | 7   |
| <b>Data collection methods</b> - Types of data collected; details of data collection procedures including (as appropriate) start and stop dates of data collection and analysis, iterative process, triangulation of sources/methods, and modification of procedures in response to evolving study findings; rationale**                                                                             | 6-7 |
| <b>Units of study</b> - Number and relevant characteristics of participants, documents, or events included in the study; level of participation (could be reported in results)                                                                                                                                                                                                                       | 6-7 |
| <b>Data processing</b> - Methods for processing data prior to and during analysis, including transcription, data entry, data management and security, verification of data integrity, data coding, and anonymization/de-identification of excerpts                                                                                                                                                   | 7   |
| <b>Data analysis</b> - Process by which inferences, themes, etc., were identified and developed, including the researchers involved in data analysis; usually references a specific paradigm or approach; rationale**                                                                                                                                                                                | 7   |
| <b>Techniques to enhance trustworthiness</b> - Techniques to enhance trustworthiness and credibility of data analysis (e.g., member checking, audit trail, triangulation); rationale**                                                                                                                                                                                                               | 7   |

## Results/findings

|                                                                                                                                                                                                   |       |
|---------------------------------------------------------------------------------------------------------------------------------------------------------------------------------------------------|-------|
| <b>Synthesis and interpretation</b> - Main findings (e.g., interpretations, inferences, and themes); might include development of a theory or model, or integration with prior research or theory | 8-9   |
| <b>Links to empirical data</b> - Evidence (e.g., quotes, field notes, text excerpts, photographs) to substantiate analytic findings                                                               | 10-17 |

## Discussion

|                                                                                                                                                                                                                                                                                                                                                                                                             |       |
|-------------------------------------------------------------------------------------------------------------------------------------------------------------------------------------------------------------------------------------------------------------------------------------------------------------------------------------------------------------------------------------------------------------|-------|
| <b>Integration with prior work, implications, transferability, and contribution(s) to the field</b> - Short summary of main findings; explanation of how findings and conclusions connect to, support, elaborate on, or challenge conclusions of earlier scholarship; discussion of scope of application/generalizability; identification of unique contribution(s) to scholarship in a discipline or field | 17-19 |
| <b>Limitations</b> - Trustworthiness and limitations of findings                                                                                                                                                                                                                                                                                                                                            | 21-22 |

## Other

|                                                                                                                                               |    |
|-----------------------------------------------------------------------------------------------------------------------------------------------|----|
| <b>Conflicts of interest</b> - Potential sources of influence or perceived influence on study conduct and conclusions; how these were managed | 22 |
| <b>Funding</b> - Sources of funding and other support; role of funders in data collection, interpretation, and reporting                      | 22 |

## Disciplinary background of the research team

The formation of the research team was based on the shared research interests and mutual respect among the members. The team met regularly to discuss the study's progress, addressed any discrepancies, and ensured methodological rigor throughout the research process. The collaborative nature of the team allowed for robust discussions, enhancing the analysis and interpretation of the data. The diverse disciplinary backgrounds of the research team facilitated a comprehensive and multifaceted approach to data collection and analysis. The team members' expertise informed the selection of appropriate data collection methods, such as in-depth interviews and focus groups, and guided the coding and thematic analysis of the qualitative data.

In summary, the research team consisted of individuals with expertise in Sociology, Public Health, Pharmacy, Statistics and Education Research bringing together a range of perspectives and knowledge to the study. The formation of the team was based on shared research interests and collaboration, which fostered rigorous research practices and enriched the interpretation of findings.

- (1) **Md. Al-Mamun**, the principal investigator has extensive experience in qualitative research methodologies. His background was Sociology, contributed his expertise in social theory and qualitative research methods to the team. With his background in studying social interactions and cultural phenomena, he provided valuable insights into the interpretation and contextualization of the findings. He played a crucial role in developing the research questions, designing the study, and analyzing the data
- (2) **Morshed Alam**, a public health researcher brought his expertise in health promotion and behavior change to the team. His understanding of public health frameworks and interventions enriched the study's conceptualization and helped connect the findings to potential implications for health policy and practice.
- (3) **Mr. Md. Jamal Hossain** is currently working as an Assistant Proctor of the State University of Bangladesh and Lecturer in the Department of Pharmacy, State University of Bangladesh, Dhaka, Bangladesh. His current research mainly focuses on various fields of Pharmacology and the drug development process. He has worked on drug-drug interaction (synergistic and antagonistic effects), drug-biomolecular interactions, and organometallic chemistry. Besides, he has experience in chemical and biological investigations of natural products isolated from various medicinal plant and animal sources through in vitro, in vivo, and in silico approaches. Moreover, Mr. Hossain is highly fascinated

with engaging in Public Health and Pharmacy Practice related research. He helped to analyzed data, conceptualizing research design and guide team to have done work successfully.

- (4) **Mst. Rukaia Khatun**, a young public health researcher brought her expertise in health promotion and behavior change to the team. Her expertise on public health research, epidemiology and so on. She helped to collected data on field level, interpreted data and wrote paper.
- (5) **Pranto Kumer Das**, background in Sociology contributed his expertise in social theory and qualitative research methods to the team. He helped to collected data on field level, interpreted data and wrote paper.
- (6) **Falguni Alam**, working as Project Research Physician, icddr,b. She is working at community level for the underprivileged on youth development and Breast cancer, Cervical Cancer, Ante and Postnatal care, Nutrition, Menstrual Hygiene. adolescent depression etc. focusing on Sustainable Development Goals (SDG) and Diabetes and other medical conditions across all age groups. She helped to collected data, conducted interviews and wrote paper.
- (7) **Md. Rabiul Islam, PhD**, Associate Professor, Department of Pharmacy Coordinator, University of Asia Pacific, Dhaka, Bangladesh. His research interest includes epidemiology, public health, mental health, healthcare burden, and healthcare policy. He has highly expertise on disease epidemiology, public health, mental health, healthcare burden, and healthcare policy. He helped to analyzed data, conceptualizing design and wrote paper.
- (8) **Foyez Ahmed**, Department of Statistics, Comilla University has expertise on statistics, Behavioural Economics, Business Administration, Consumer Economics. His research is mainly focus on Maternal Health and Child Health. He helped to conducted FGD's, analyzed and interpreted data.
- (9) **Md. Monirul Islam PhD**, Associate Professor, Department of Pharmacy at State University of Bangladesh. He brought a wealth of knowledge from the field of public health, which broadened the study's conceptualization and helped make connections between the study's findings and their possible policy and practice applications.

## Questionnaire (English)

### Interviewer Introduction – READOUT

Hello. I am.....

I, along with our team (introduction is given in the annexure), investigates of this study is to explore an in-depth understanding of surrounding circumstances and associated factors of each drowning child fatality occurring in Bangladesh.

### Confidentiality

The respondents' data would be entirely used for the above purpose. Your opinion will remain concealed, and we assure you that no individual response or information will be reported anywhere else. We would be grateful if you gave us 15-20 minutes for the study.

### Study Setting/Area:

- Dhaka and seven other districts in Bangladesh - Chapainawabganj, Dinajpur, Gopalganj, Feni, Barisal, Satkhira, and Mymensingh -which encompassed six of the seven divisions.

### PART- A: Socio-demographic characteristics of the Respondents

- i. **Name:** \_\_\_\_\_ (If respondents feel not free then maybe use pseudonym)
- ii. **Age:** \_\_\_\_\_ (in years)
- iii. **Sex:** \_\_\_\_\_
- iv. **Profession:** \_\_\_\_\_
- v. **Monthly family income:** \_\_\_\_\_ tk.
- vi. **What is the level of education attained?**
  - a) Primary Level    b) Secondary Level    c) University Level    d) None
- vii. **Number of family members:** \_\_\_\_\_ (total)
- viii. **Number of children's in a family:** \_\_\_\_\_
- ix. **Types of Family:**    a) Nuclear           b) Extended/Joint
- x. **Area of residence:** \_\_\_\_\_ (region)

### PART- B: Questions for an In-Depth Interview (IDI)

1. In your opinion, what are the main factors contributing to child drowning fatalities in Bangladesh?  
Please share your valuable opinion

2. Can you please tell me about your personal experiences or observations regarding child drowning incidents in Bangladesh?
3. In your opinion, why do parents in Bangladesh struggle with providing adequate supervision and monitoring for their children?
4. How does parental monitoring and supervision play a role in child drowning incidents? Can you please provide examples or incidents related to this?
5. In your view, how do poor living standards and socioeconomic factors affect child drowning incidents? Can you please share any specific incidents or stories related to this?
6. How does the division of attention among multiple children in a family contribute to the risk of child drowning?
7. What are the geographical features in your area that contribute to a risk of child drowning?
8. How do seasonal factors, such as monsoon rains and flooding, increase the risk of child drowning in Bangladesh?
9. Can you discuss the influence of peer pressure and risky behaviors on child drowning incidents? Do you have any examples or incidents to share?
10. What role does social stigma and prejudices play in child drowning incidents? Are there any cultural beliefs or myths related to child drowning in your locality?
11. How do natural disasters and calamities, such as hurricanes, earthquakes, and flooding, contribute to child drowning incidents in Bangladesh? Please share your valuable opinion
12. Are there any community-based programs or initiatives that promote safe behaviors around water bodies? Please share your valuable opinion
13. Based on your knowledge and experience, what interventions or preventive measures do you think could be effective in reducing child drowning incidents in Bangladesh?
14. How can awareness and education about child drowning be increased in underprivileged areas?
15. How can community awareness and education be improved to address social stigma and prejudices related to child drowning?

**PART- C: Questions for Focus Group Discussions (FGD)**

1. What are some common scenarios or situations where parental supervision is compromised, leading to child drowning incidents?
2. How does the geographic location of Bangladesh, with its numerous rivers, ponds, and water bodies, contribute to the high rate of child drowning?
3. Specifically, how does the proximity of houses to waterways in the southern region of Bangladesh increase the risk for children?

4. What are the specific areas or regions in Bangladesh that are most affected by flooding and subsequent drowning incidents?
5. How can families and communities better prepare and protect children during the monsoon season to prevent drowning?
6. How do socioeconomic and financial factors contribute to child drowning incidents?
7. In what ways do poverty and large families affect the supervision and safety of children, leading to higher risks of drowning?
8. Are there any existing support systems or interventions that can help alleviate the drowning risks faced by underprivileged children?
9. How does peer pressure influence children's behaviors and increase the risk of drowning?
10. What measures should be taken to educate children about water safety and minimize the influence of peer pressure in such situations?
11. How do societal myths and prejudices contribute to the risk of child drowning in certain communities?
12. Are there any specific beliefs or cultural practices that hinder the rescue or prevention of child drowning incidents?
13. How can awareness campaigns and education help address social stigma and change these misconceptions?
14. What are the immediate and long-term risks faced by children during and after such disasters?
15. What measures can be taken at the community and government levels to mitigate the impact of natural disasters on child drowning?



## Questionnaire (Bengali)

### Interviewer Introduction – READOUT

Hello. আমি.....

আমি এবং আমাদের দল (সংযুক্তিতে ভূমিকা দেওয়া হয়েছে) নিয়ে এই গবেষণার অনুসন্ধানের উদ্দেশ্য হল আশেপাশের পরিস্থিতি এবং বাংলাদেশে ঘটে যাওয়া প্রতিটি ডুবে যাওয়া শিশুর মৃত্যুর সাথে সম্পর্কিত কারণগুলি গভীরভাবে বোঝার চেষ্টা করা।

### গোপনীয়তা

উত্তরদাতাদের ডেটা সম্পূর্ণরূপে উপরের উদ্দেশ্যে ব্যবহার করা হবে। আপনার মতামত গোপন থাকবে, এবং আমরা আপনাকে আশ্বস্ত করছি যে অন্য কোথাও কোনও ব্যক্তিগত প্রতিক্রিয়া বা তথ্য রিপোর্ট করা হবে না। আপনি যদি আমাদের অধ্যয়নের জন্য 15-20 মিনিট সময় দেন তবে আমরা কৃতজ্ঞ হব।

### Study Setting/Area:

- Dhaka and seven other districts in Bangladesh - Chapainawabganj, Dinajpur, Gopalganj, Feni, Barisal, Satkhira, and Mymensingh -which encompassed six of the seven divisions.

### PART- A: Socio-demographic characteristics of the Respondents

i নাম: \_\_\_\_\_ (যদি উত্তরদাতারা মুক্ত না মনে করেন তাহলে ছদ্মনাম ব্যবহার করতে পারেন)

ii. বয়স: \_\_\_\_\_ (বছরে)

iii. লিঙ্গ: \_\_\_\_\_

iv পেশা: \_\_\_\_\_

v. মাসিক পারিবারিক আয়: \_\_\_\_\_ টাকা।

vi আপনার অর্জিত শিক্ষার স্তর কি?

ক) প্রাথমিক স্তর খ) মাধ্যমিক স্তর গ) বিশ্ববিদ্যালয় স্তর ঘ) কোনটি নয়

vii পরিবারের সদস্য সংখ্যা: \_\_\_\_\_ (মোট)

viii. আপনার পরিবারে শিশুর সংখ্যা: \_\_\_\_\_

ix পরিবারের ধরন:

ক) একক পরিবার      খ) যৌথ পরিবার

x আপনার বসবাসের এলাকার ধরণ: \_\_\_\_\_ (অঞ্চল)

**PART- B: Questions for an In-Depth Interview (IDI)**

1. আপনার মতে, বাংলাদেশে শিশুর পানিতে ডুবে মৃত্যুর প্রধান কারণ কী? আপনার মূল্যবান মতামত শেয়ার করুন
2. বাংলাদেশে শিশু ডুবে যাওয়ার ঘটনা সম্পর্কে আপনার ব্যক্তিগত অভিজ্ঞতা বা পর্যবেক্ষণ সম্পর্কে আপনি কি দয়াকরে কিছু বলবেন?
3. আপনার মতে, কেন বাংলাদেশের বাবা-মায়েরা তাদের সন্তানদের জন্য পর্যাপ্ত তত্ত্বাবধান এবং পর্যবেক্ষণের ব্যবস্থা করতে হিমশিম খাচ্ছেন?
4. শিশুর ডুবে যাওয়ার ঘটনায় পিতামাতার পর্যবেক্ষণ এবং তত্ত্বাবধান কীভাবে ভূমিকা পালন করে? আপনি এই সম্পর্কিত উদাহরণ বা ঘটনা প্রদান করতে পারেন?
5. আপনার দৃষ্টিতে, দরিদ্র জীবনযাত্রার মান এবং আর্থ-সামাজিক কারণগুলি কীভাবে শিশু ডুবে যাওয়ার ঘটনাকে প্রভাবিত করে? আপনি কি এই সম্পর্কিত কোন নির্দিষ্ট ঘটনা বা গল্প শেয়ার করতে পারেন?
6. একটি পরিবারের একাধিক শিশুর মধ্যে মনোযোগের বিভাজন কীভাবে শিশুর ডুবে যাওয়ার ঝুঁকিতে অবদান রাখে? আপনার মূল্যবান মতামত দয়াকরে শেয়ার করুন
7. আপনার এলাকার ভৌগলিক বৈশিষ্ট্যগুলি কী যা শিশুর ডুবে যাওয়ার ঝুঁকিতে অবদান রাখে?
8. বর্ষার বৃষ্টি এবং বন্যার মতো মৌসুমি কারণগুলি কীভাবে বাংলাদেশে শিশুর ডুবে যাওয়ার ঝুঁকি বাড়ায়?
9. আপনি কি শিশুর ডুবে যাওয়ার ঘটনায় বন্ধুহলের চাপ এবং ঝুঁকিপূর্ণ আচরণের প্রভাব নিয়ে আলোচনা করতে পারেন? আপনি শেয়ার করার জন্য কোন উদাহরণ বা ঘটনা আছে?
10. শিশু ডুবে যাওয়ার ঘটনায় সামাজিক প্ররচনা এবং কুসংস্কার কী ভূমিকা পালন করে? আপনার এলাকায় শিশুর ডুবে যাওয়ার সাথে সম্পর্কিত কোন সাংস্কৃতিক বিশ্বাস বা মিথ আছে কি?
11. প্রাকৃতিক দুর্ঘটনা এবং দুর্ঘটনা, যেমন হারিকেন, ভূমিকম্প এবং বন্যা, কীভাবে বাংলাদেশে শিশু ডুবে যাওয়ার ঘটনাকে অবদান রাখে? আপনার মূল্যবান মতামত শেয়ার করুন

12. কোন সম্প্রদায়-ভিত্তিক প্রোগ্রাম বা উদ্যোগ আছে যা জলাশয়ের চারপাশে নিরাপদ আচরণের প্রচার করে? আপনার মূল্যবান মতামত শেয়ার করুন
13. আপনার জ্ঞান এবং অভিজ্ঞতার ভিত্তিতে, বাংলাদেশে শিশু ডুবে যাওয়ার ঘটনা কমাতে কোন হস্তক্ষেপ বা প্রতিরোধমূলক ব্যবস্থা কার্যকর হতে পারে বলে আপনি মনে করেন?
14. কীভাবে সুবিধাবঞ্চিত এলাকায় শিশু ডুবে যাওয়ার বিষয়ে সচেতনতা ও শিক্ষা বাড়ানো যায়? আপনার মূল্যবান মতামত দিন
15. শিশুর ডুবে যাওয়ার সাথে সম্পর্কিত সামাজিক কলঙ্ক এবং কুসংস্কার মোকাবেলায় কীভাবে সম্প্রদায়ের সচেতনতা এবং শিক্ষা উন্নত করা যেতে পারে?

**PART- C: Questions for Focus Group Discussions (FGD)**

1. কিছু সাধারণ পরিস্থিতি বা এমন পরিস্থিতি যেখানে পিতামাতার তত্ত্বাবধানে আপস করা হয়, যা শিশুর ডুবে যাওয়ার ঘটনা ঘটায়? আপনার মূল্যবান মতামত দিন
2. বাংলাদেশের ভৌগোলিক অবস্থান, এর অসংখ্য নদী, পুকুর এবং জলাশয় কীভাবে শিশুর পানিতে ডুবে যাওয়ার উচ্চ হারে অবদান রাখে?
3. সুনির্দিষ্টভাবে, বাংলাদেশের দক্ষিণাঞ্চলে পানির কাছাকাছি বসবাসের সান্নিধ্য কীভাবে শিশুদের জন্য ঝুঁকি বাড়ায়? আপনার মূল্যবান মতামত দিন
4. বাংলাদেশের কোন নির্দিষ্ট এলাকা বা অঞ্চলগুলি বন্যা এবং পরবর্তীতে ডুবে যাওয়ার ঘটনা দ্বারা সবচেয়ে বেশি ক্ষতিগ্রস্ত হয়?
5. কীভাবে পরিবার এবং সম্প্রদায়গুলি বর্ষা মৌসুমে শিশুদের ডুবে যাওয়া রোধ করতে আরও ভালভাবে প্রস্তুত ও সুরক্ষা দিতে পারে?
6. কীভাবে আর্থ-সামাজিক এবং আর্থিক কারণগুলি শিশুর ডুবে যাওয়ার ঘটনাগুলিতে অবদান রাখে?
7. কোন উপায়ে দারিদ্র্য এবং বড় পরিবার শিশুদের তত্ত্বাবধান এবং নিরাপত্তাকে প্রভাবিত করে, যার ফলে ডুবে যাওয়ার ঝুঁকি বেশি?
8. এমন কোন বিদ্যমান সহায়তা ব্যবস্থা বা হস্তক্ষেপ আছে যা সুবিধাবঞ্চিত শিশুদের দ্বারা ডুবে যাওয়ার ঝুঁকি কমাতে সাহায্য করতে পারে?
9. কীভাবে বন্ধু মহলের চাপ শিশুদের আচরণকে প্রভাবিত করে এবং ডুবে যাওয়ার ঝুঁকি বাড়ায়?

10. শিশুদের জল সুরক্ষা সম্পর্কে শিক্ষিত করার জন্য এবং এই ধরনের পরিস্থিতিতে সহকর্মীদের চাপের প্রভাব কমানোর জন্য কী ব্যবস্থা নেওয়া উচিত?
11. কীভাবে সামাজিক মিথ এবং কুসংস্কার নির্দিষ্ট সম্প্রদায়ের শিশুর ডুবে যাওয়ার ঝুঁকিতে অবদান রাখে?
12. এমন কোন নির্দিষ্ট বিশ্বাস বা সাংস্কৃতিক অনুশীলন আছে যা শিশু ডুবে যাওয়ার ঘটনাকে উদ্ধার বা প্রতিরোধে বাধা দেয়?
13. কীভাবে সচেতনতামূলক প্রচারাভিযান এবং শিক্ষা সামাজিক কলঙ্ক দূর করতে এবং এই ভুল ধারণাগুলি পরিবর্তন করতে সাহায্য করতে পারে?
14. এই ধরনের দুর্ঘটনের সময় এবং পরে শিশুদের তাত্ক্ষণিক এবং দীর্ঘমেয়াদী ঝুঁকিগুলি কী কী?
15. শিশুর পানিতে ডুবে যাওয়া প্রাকৃতিক দুর্ঘটনের প্রভাব প্রশমিত করার জন্য সম্প্রদায় এবং সরকারী পর্যায়ে কী ব্যবস্থা নেওয়া যেতে পারে?
